# Supplementary material for: Naturally based pyrazoline derivatives as aminopeptidase N, VEGFR2 and MMP9 inhibitors: design, synthesis and molecular modeling
Source: Royal Society of Chemistry journal article supplement (doi:10.1039/d4ra01801j), 2024-01-01
Supplement: d4ra01801j1.pdf [file d4ra01801j1.pdf]

**Design, synthesis and molecular modeling of naturally based pyrazoline derivatives as aminopeptidase N, VEGFR2 and MMP9 inhibitors**

Rasha Z. Batran<sup>1</sup>, Eman Y. Ahmed<sup>1,\*</sup>, Hanem M. Awad<sup>2</sup>, Nehad A. Abdel Latif<sup>1,\*</sup>

- **<sup>1</sup>HNMR and <sup>13</sup>CNMR of the newly synthesized compounds.**

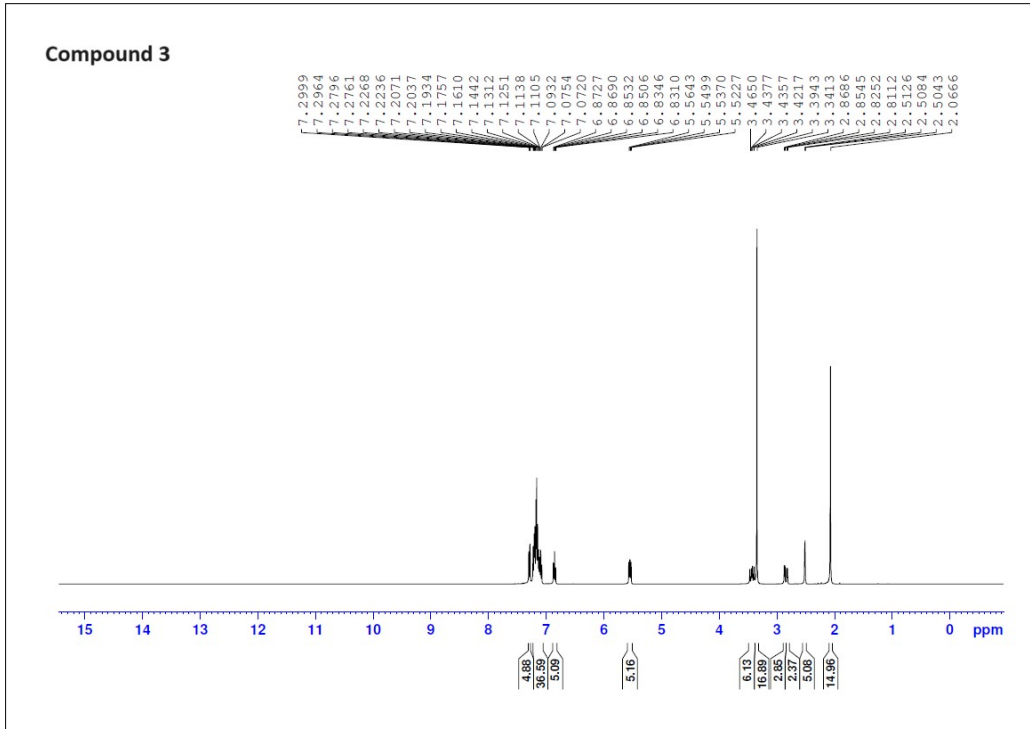

**<sup>1</sup>H NMR of compound 3**

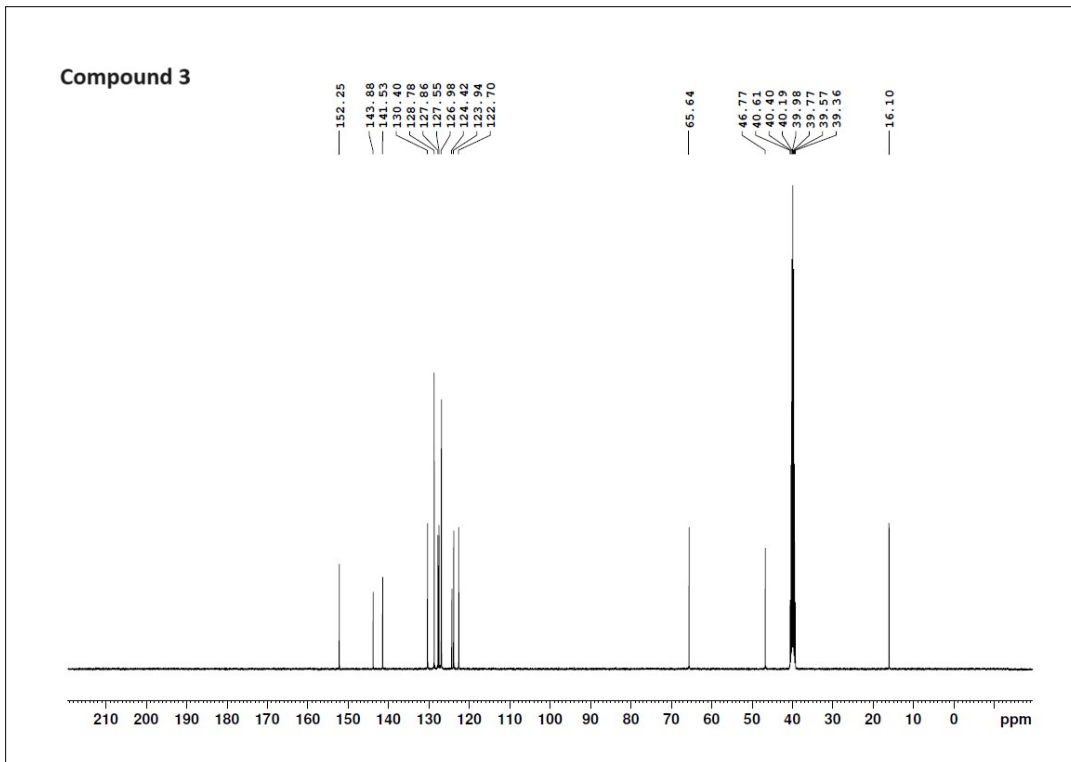

**<sup>13</sup>C NMR of compound 3**

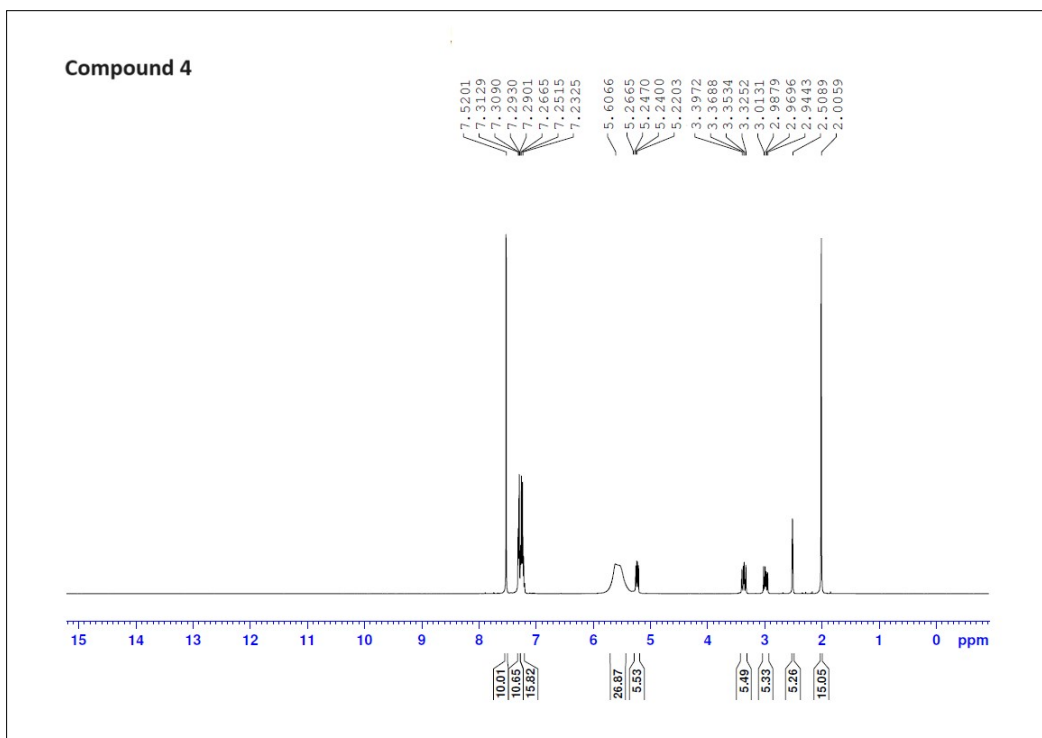

**<sup>1</sup>H NMR of compound 4**

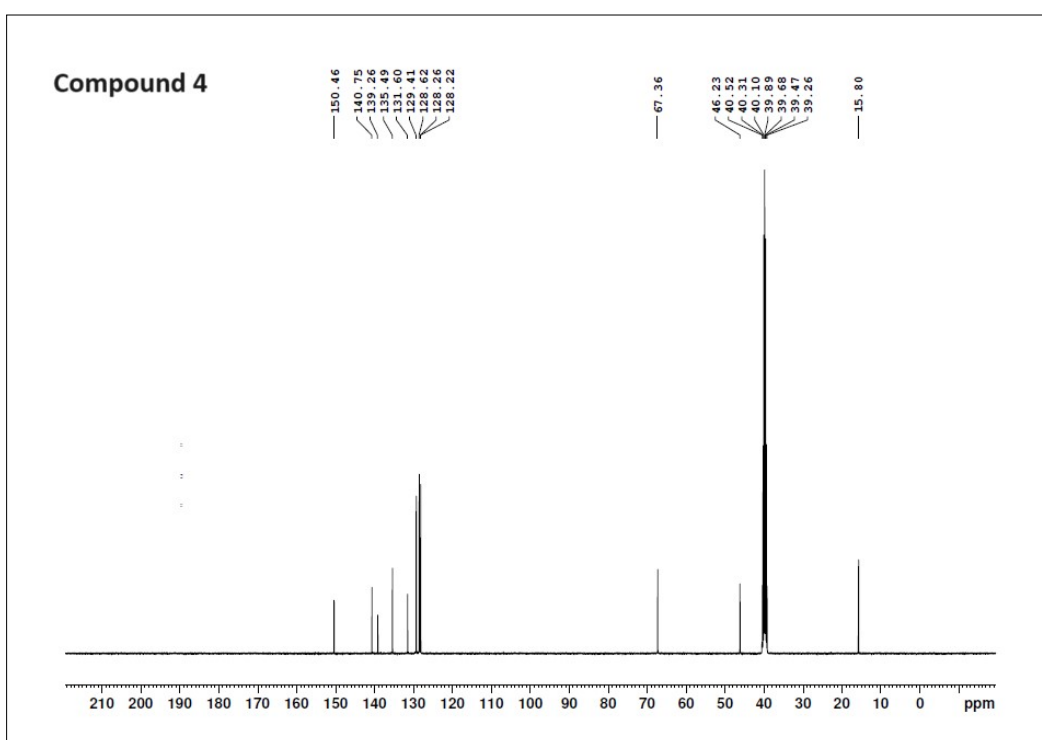

**<sup>13</sup>C NMR of compound 4**

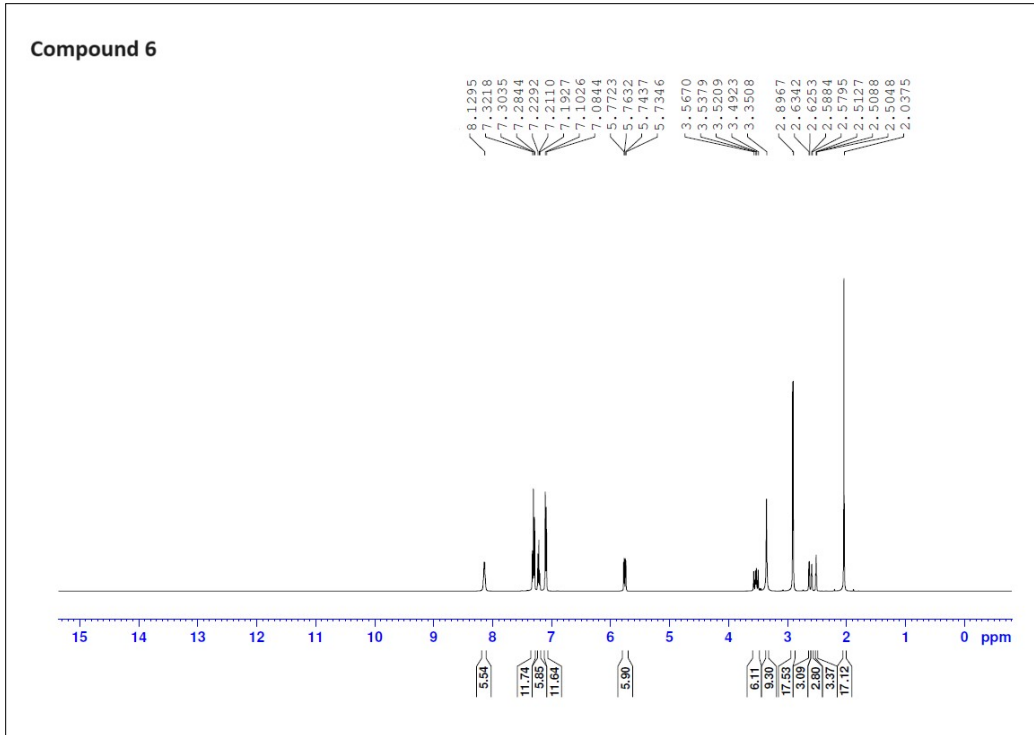

**<sup>1</sup>H NMR of compound 6**

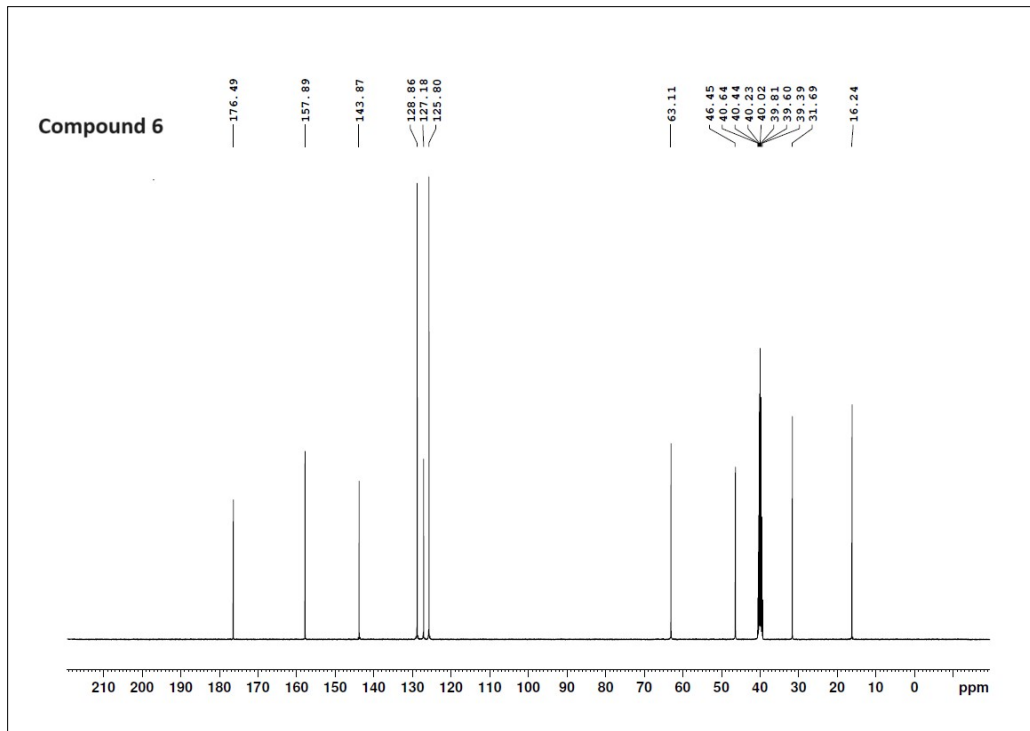

**<sup>13</sup>C NMR of compound 6**

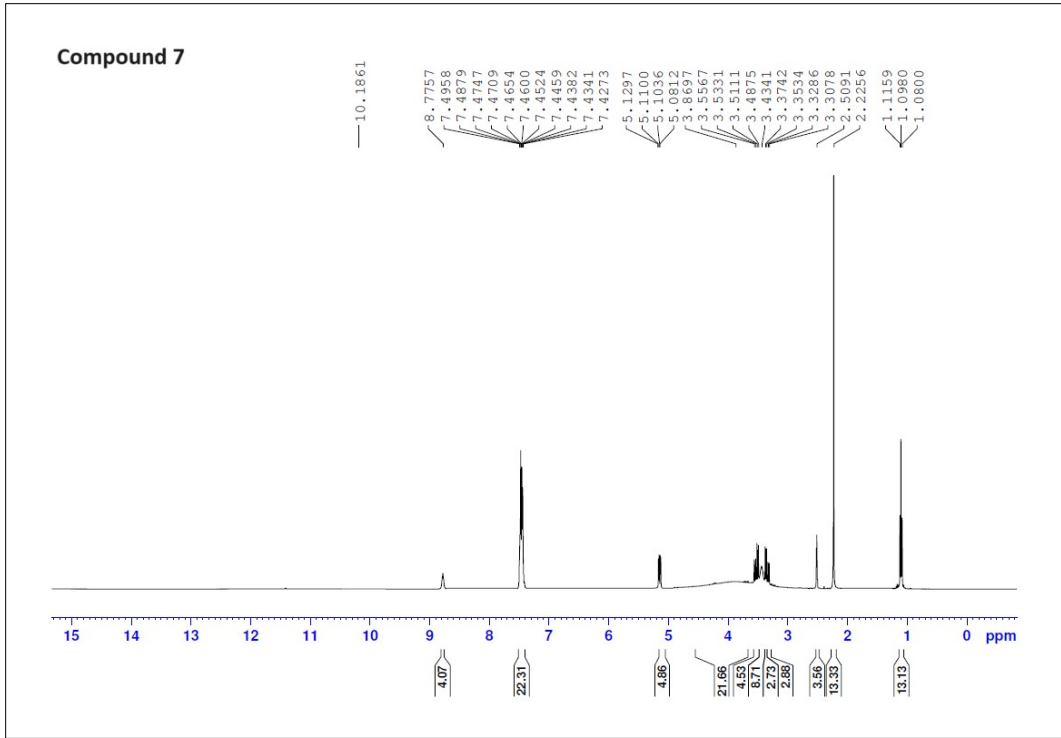

**<sup>1</sup>H NMR of compound 7**

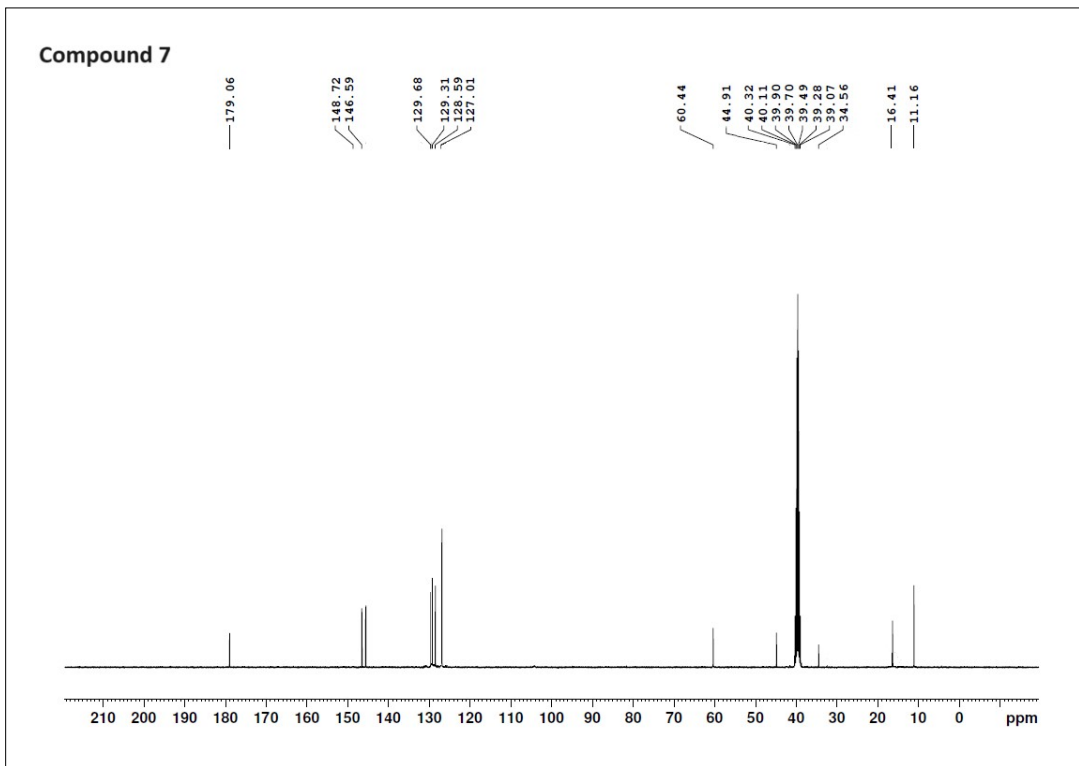

**<sup>13</sup>C NMR of compound 7**

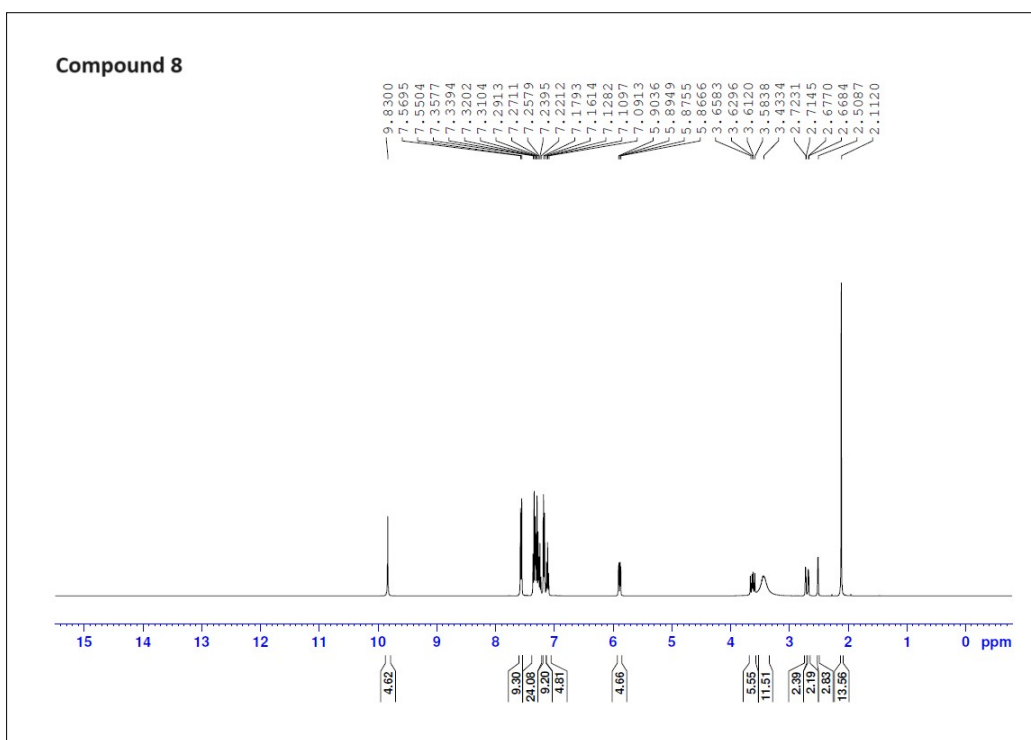

**<sup>1</sup>H NMR of compound 8**

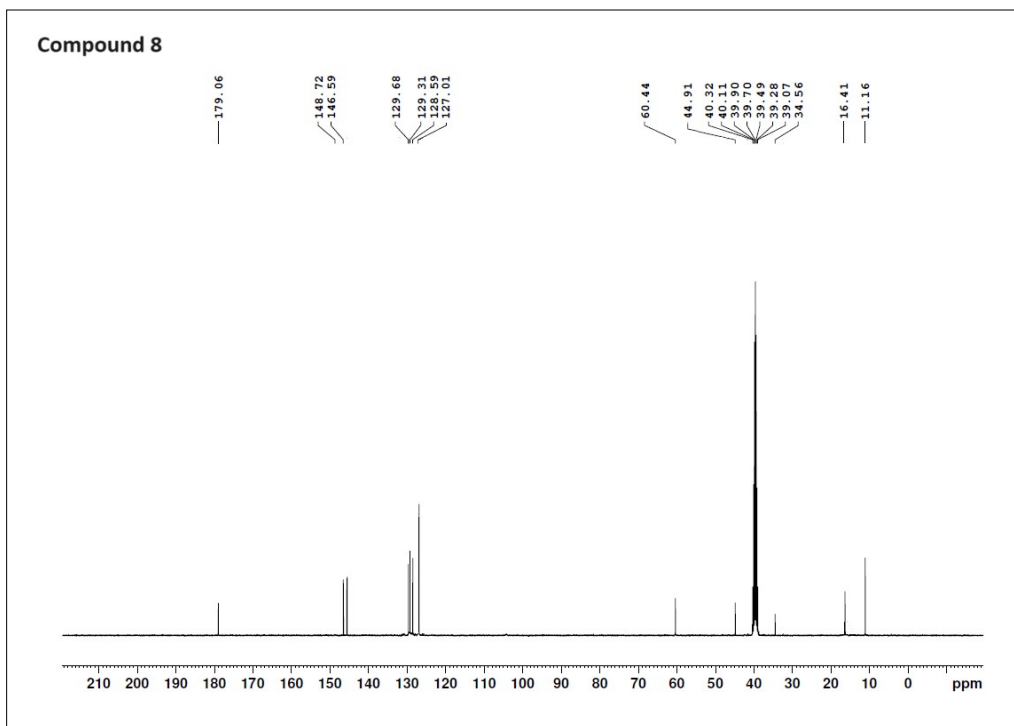

**<sup>13</sup>C NMR of compound 8**

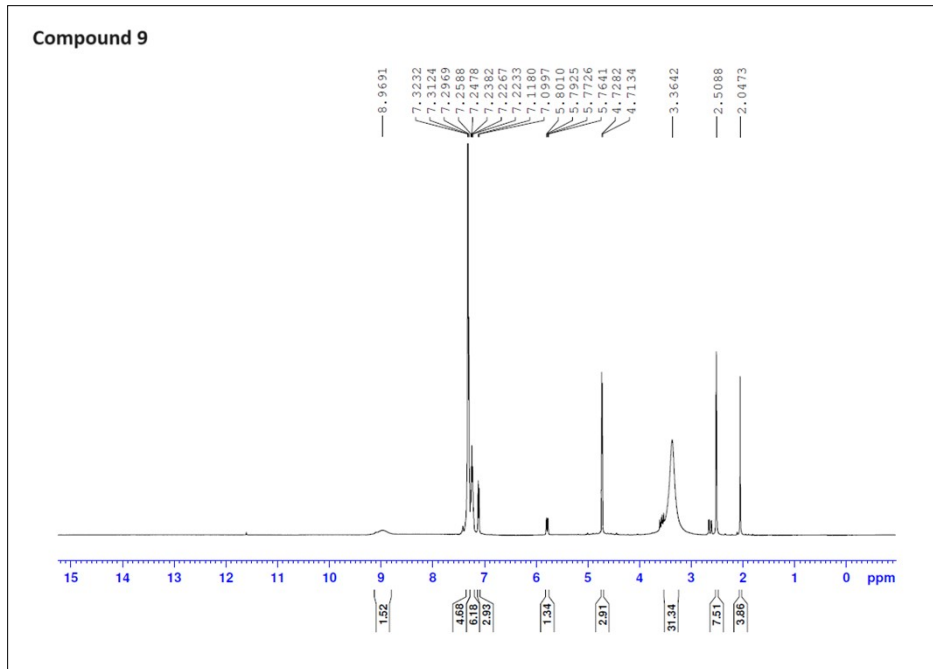

**$^1\text{H}$ NMR of compound 9**

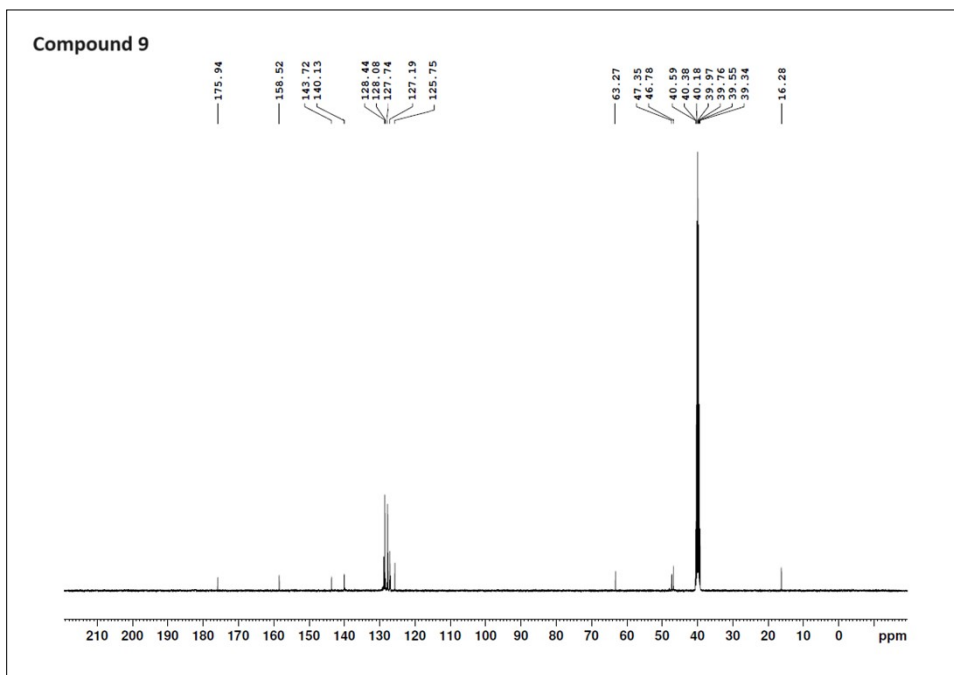

**$^{13}\text{C}$ NMR of compound 9**

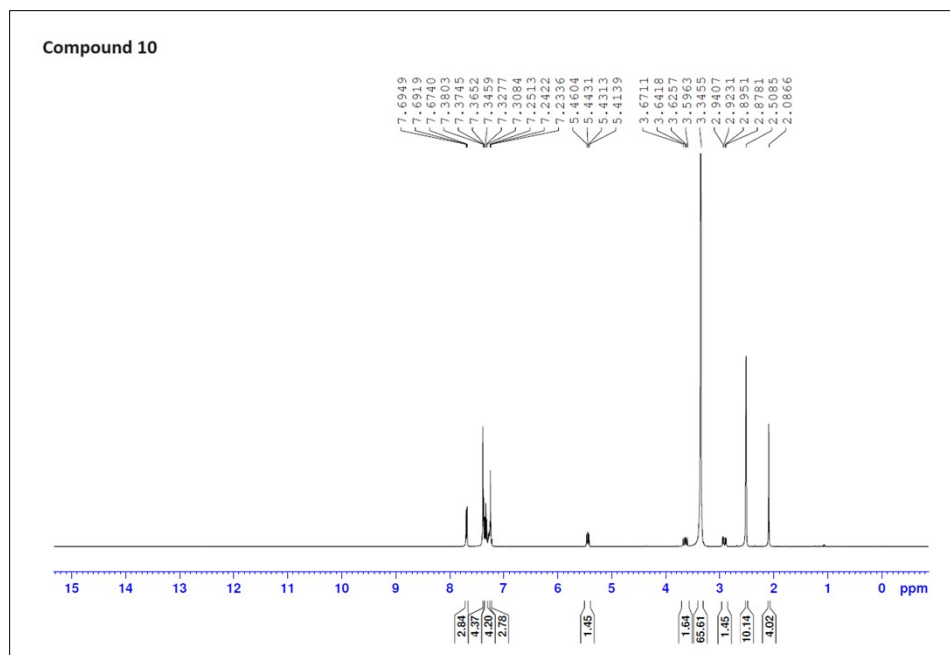

**<sup>1</sup>H NMR of compound 10**

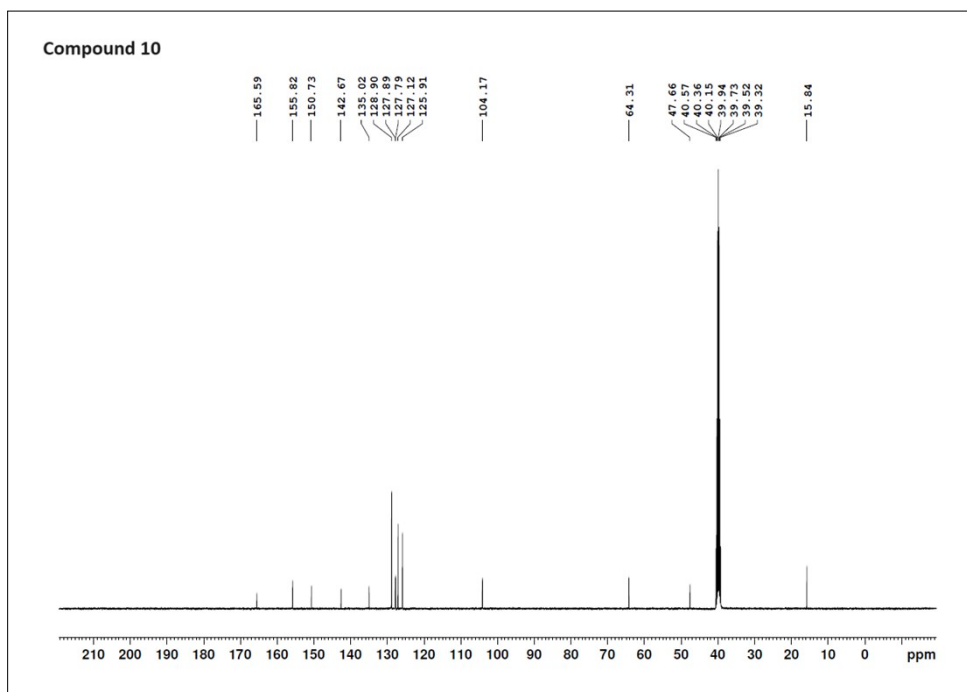

**<sup>13</sup>C NMR of compound 10**



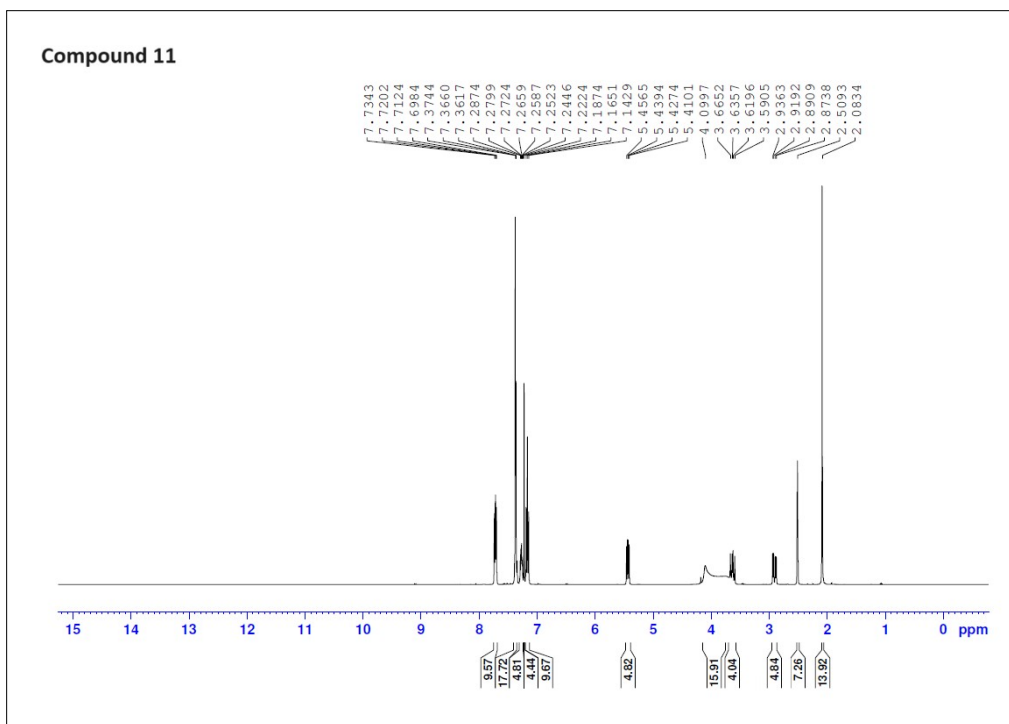

**<sup>1</sup>H NMR of compound 11**

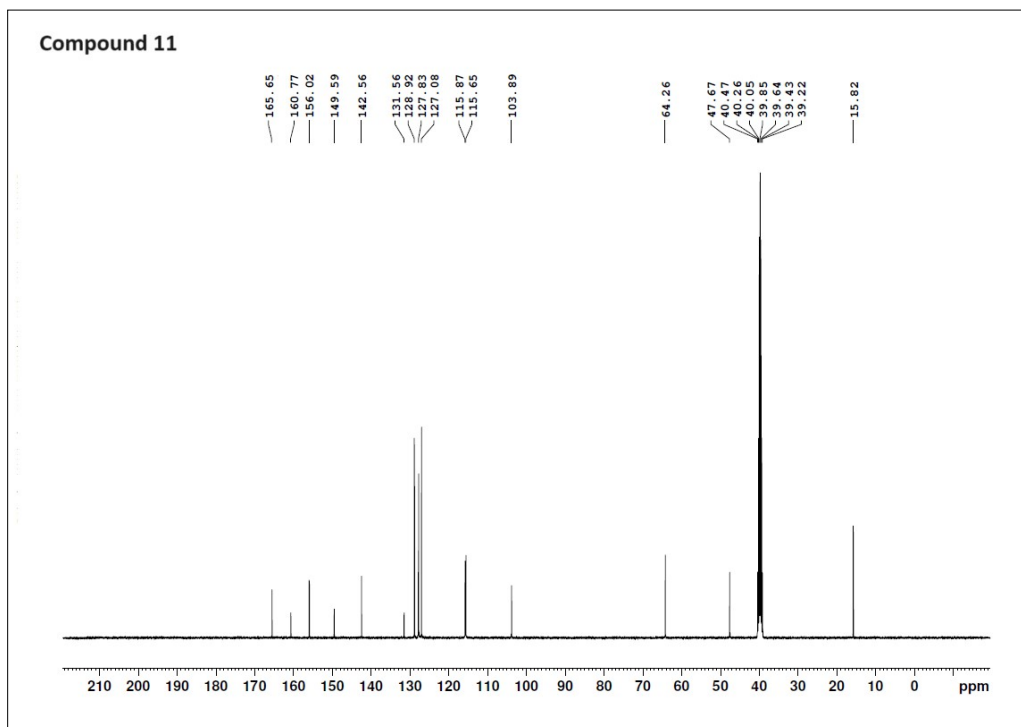

**<sup>13</sup>C NMR of compound 11**

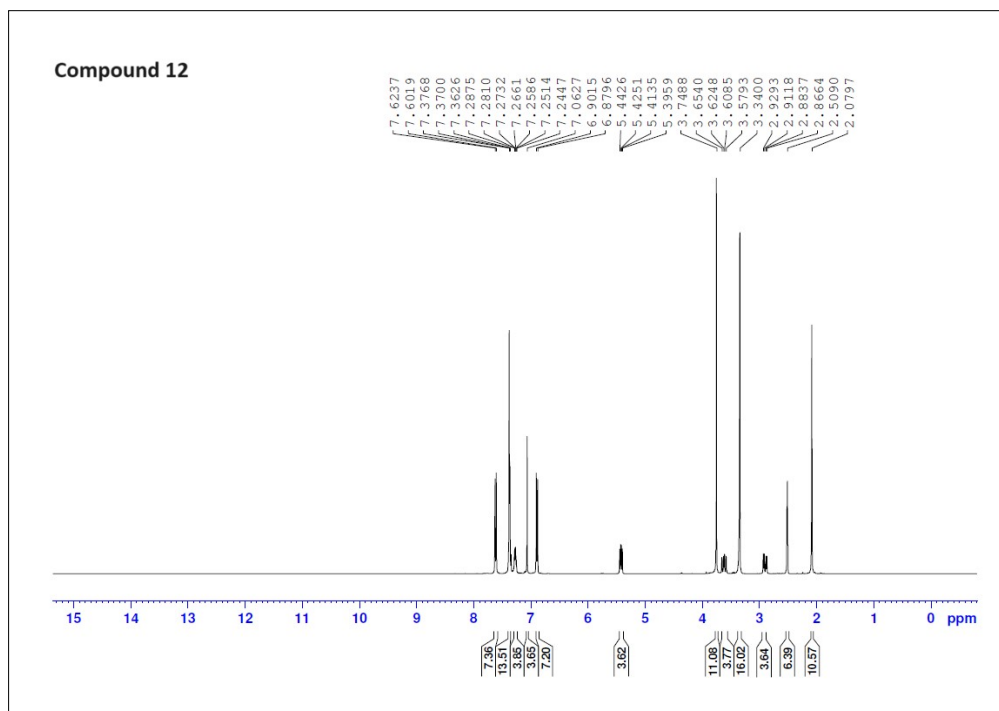

**<sup>1</sup>H NMR of compound 12**

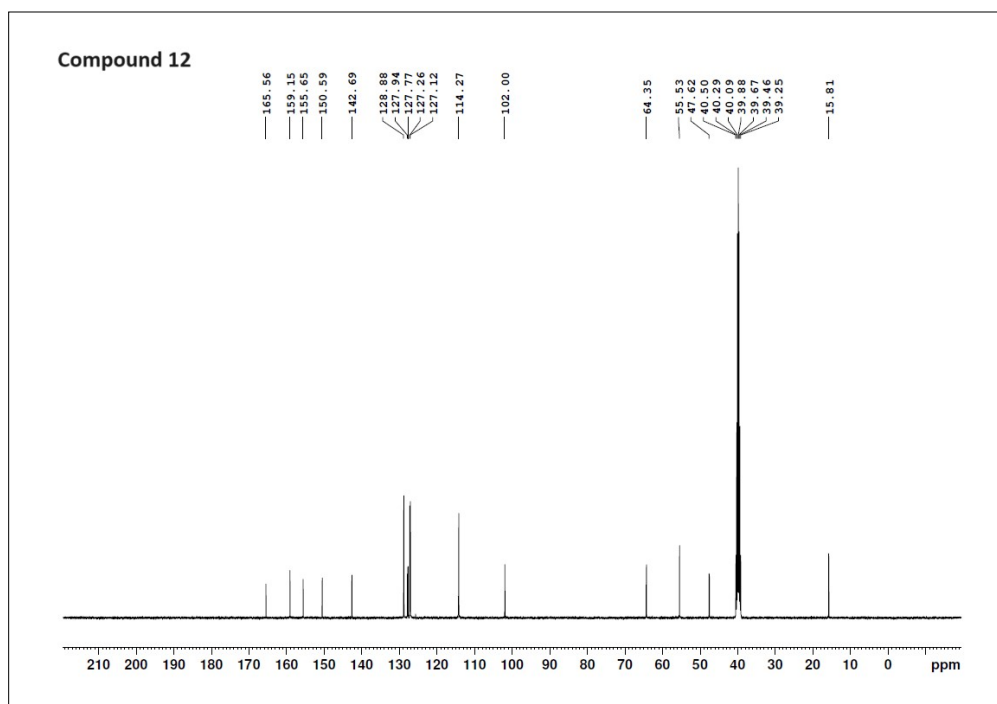

**<sup>13</sup>C NMR of compound 12**

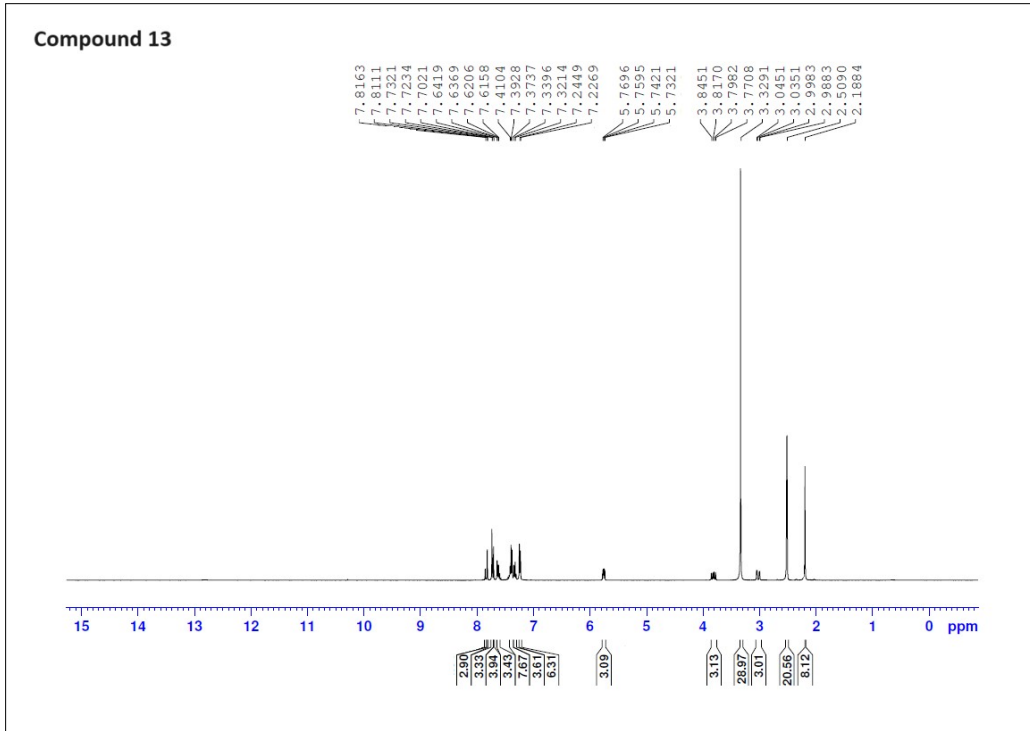

**<sup>1</sup>H NMR of compound 13**

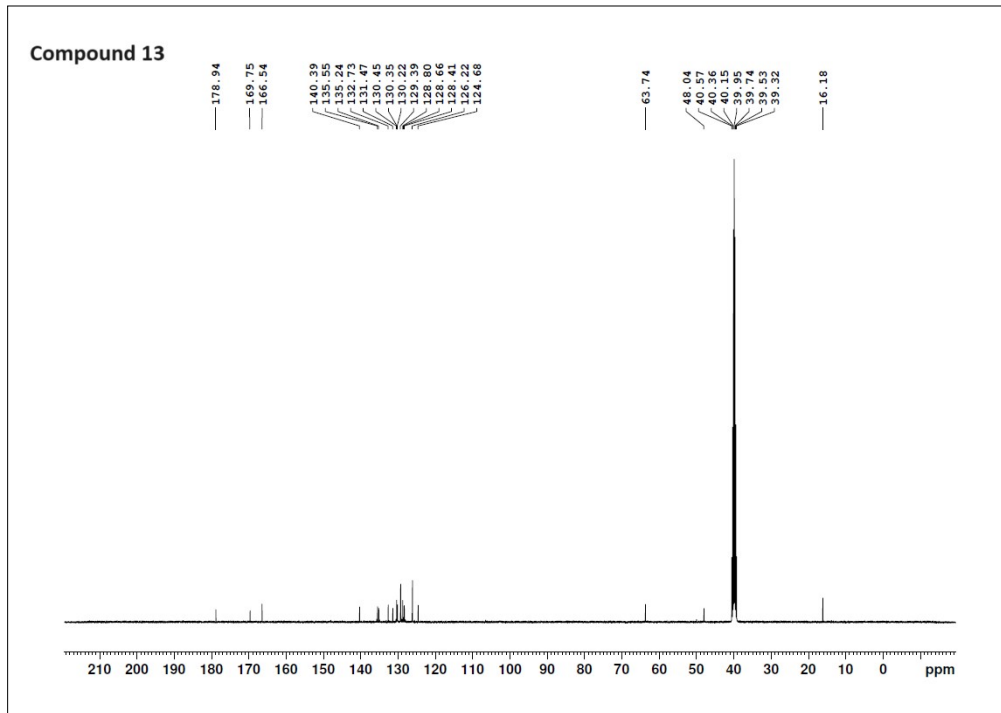

**<sup>13</sup>C NMR of compound 13**

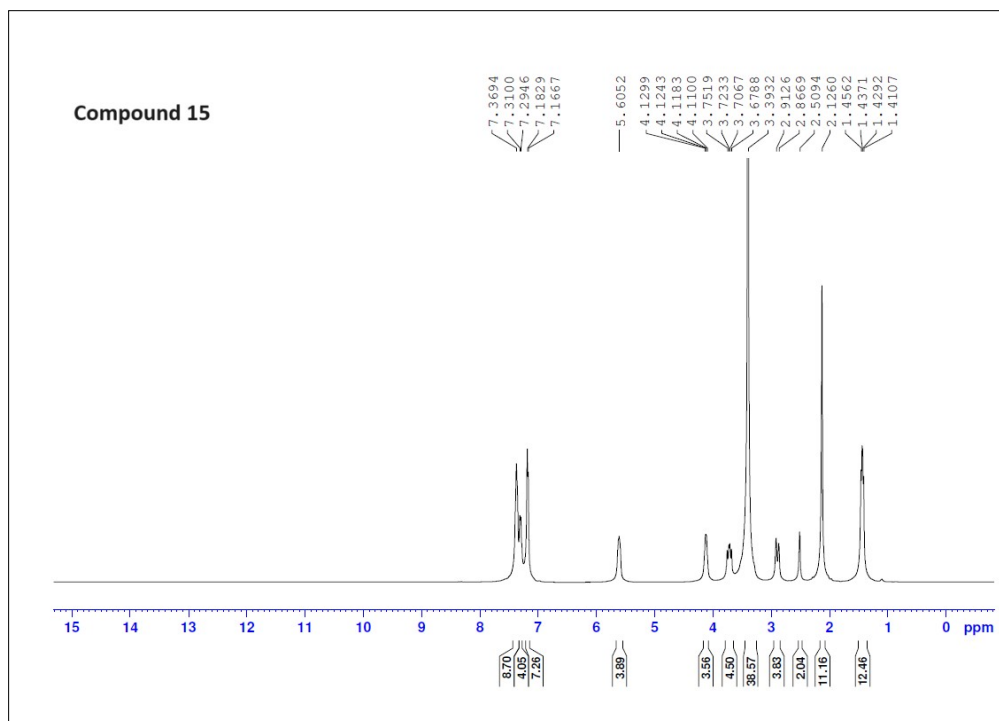

**<sup>1</sup>H NMR of compound 15**

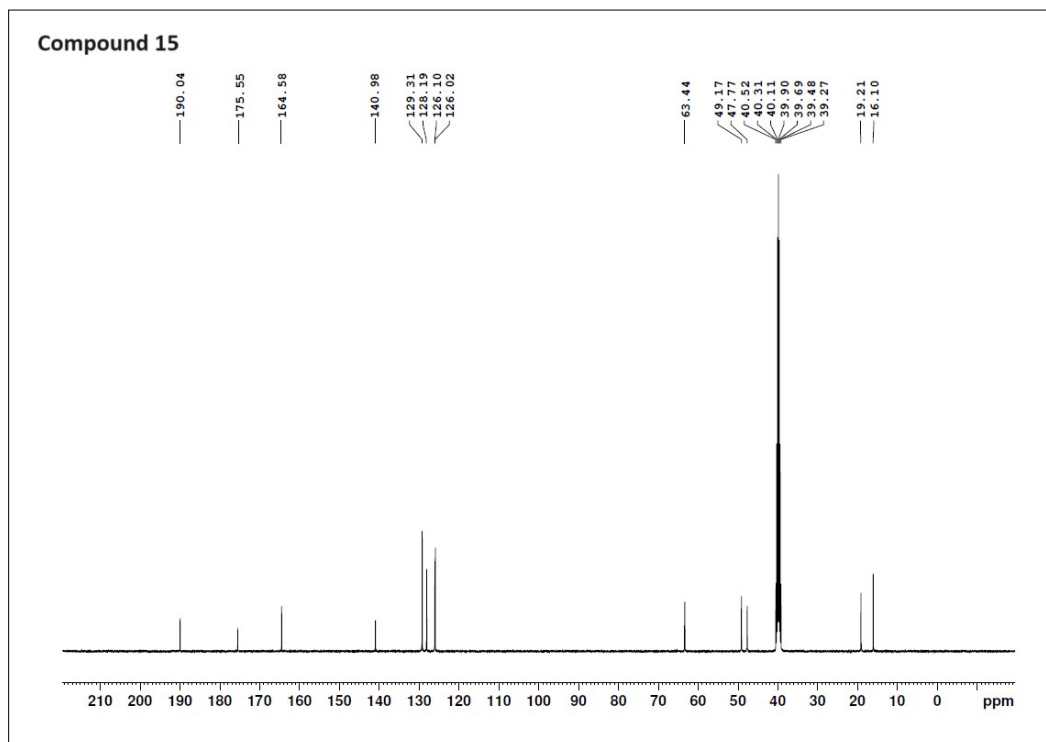

**<sup>13</sup>C NMR of compound 15**

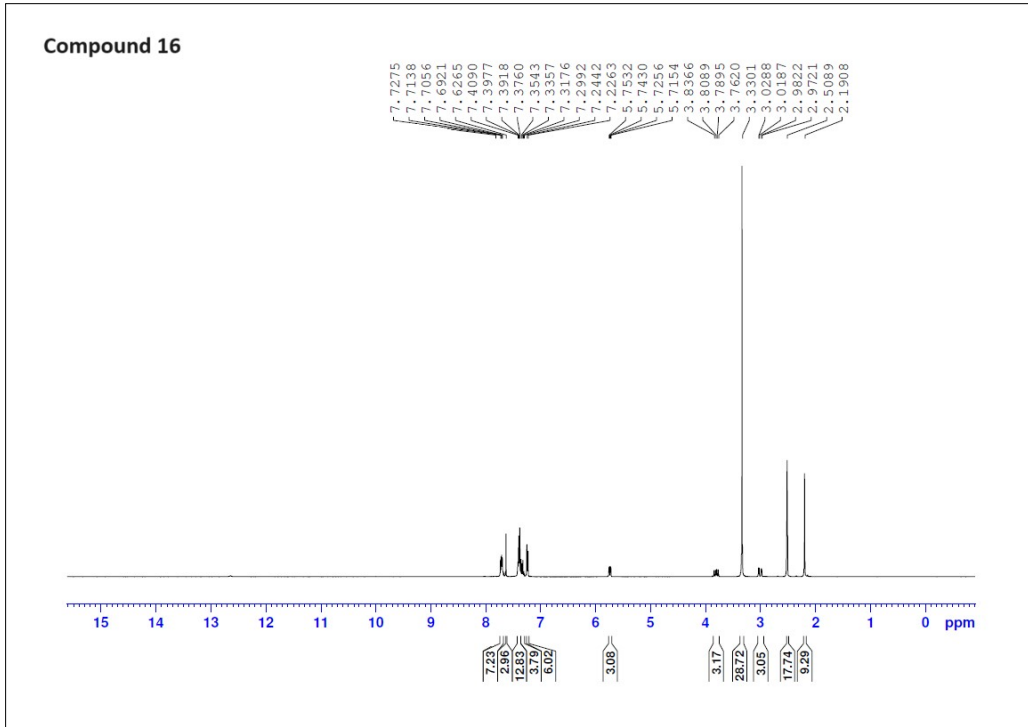

**<sup>1</sup>H NMR of compound 16**

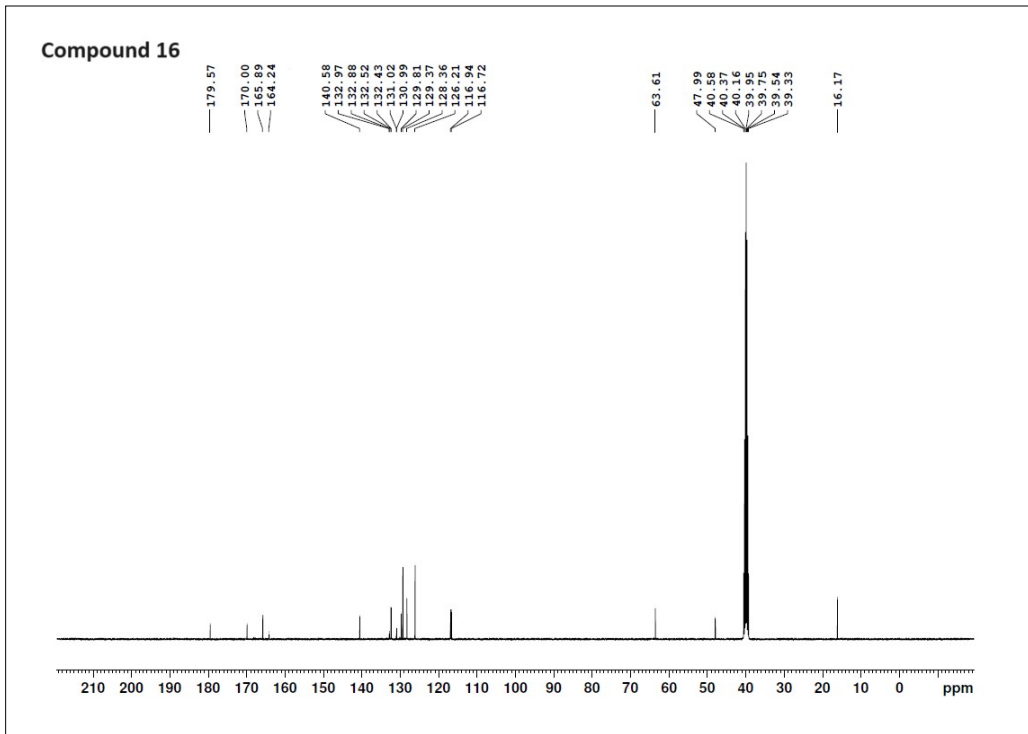

**<sup>13</sup>C NMR of compound 16**

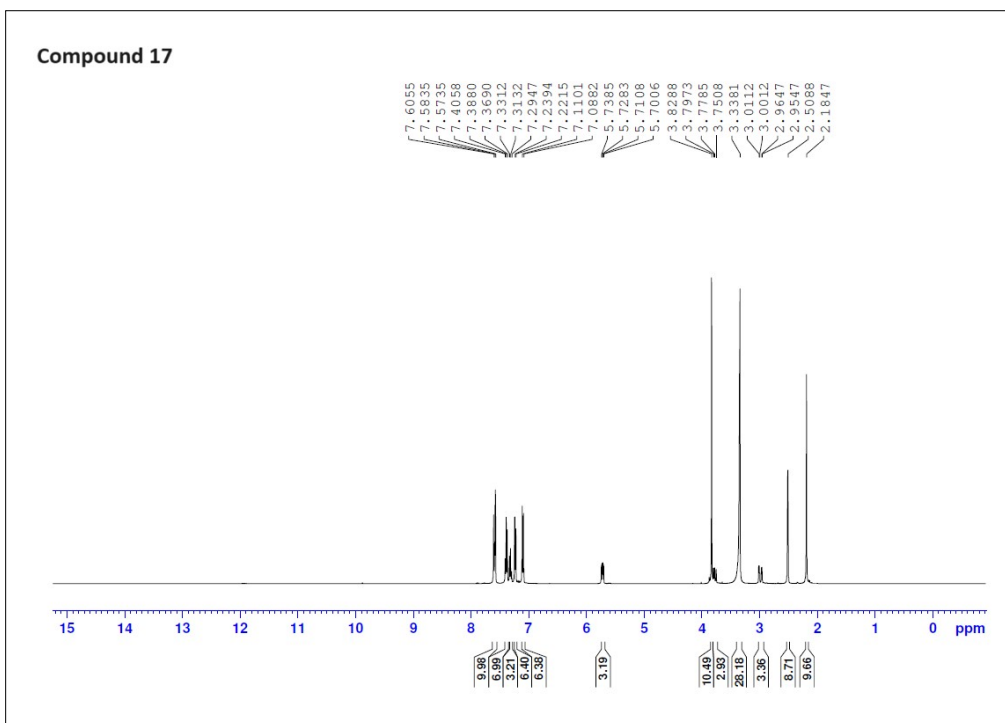

**<sup>1</sup>H NMR of compound 17**

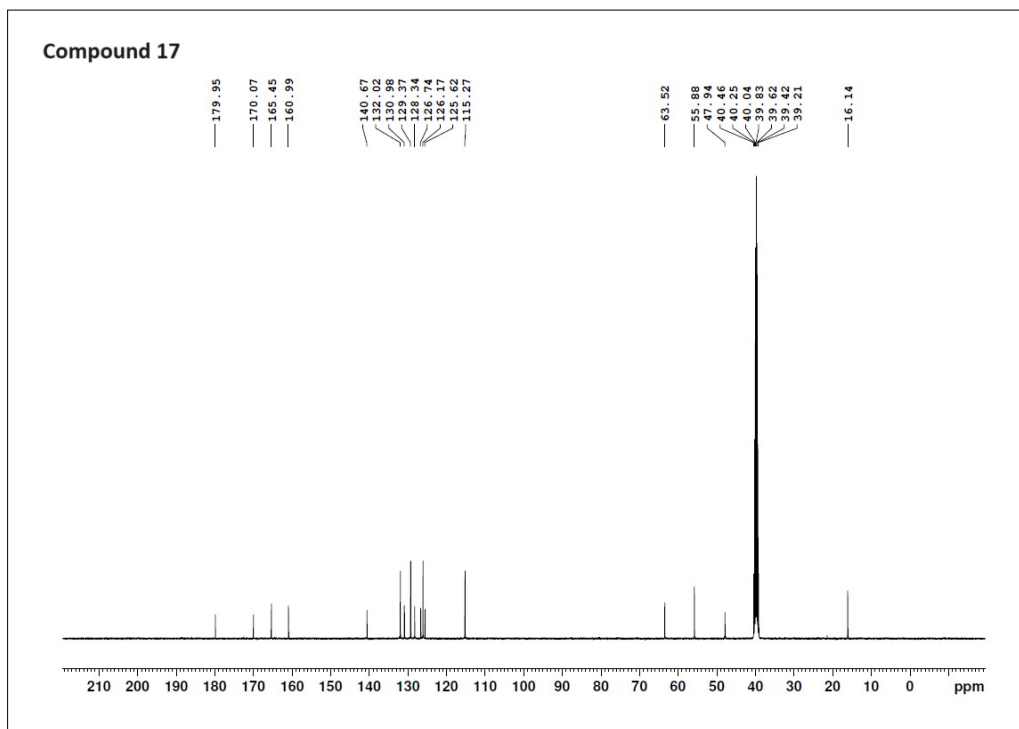

**<sup>13</sup>C NMR of compound 17**

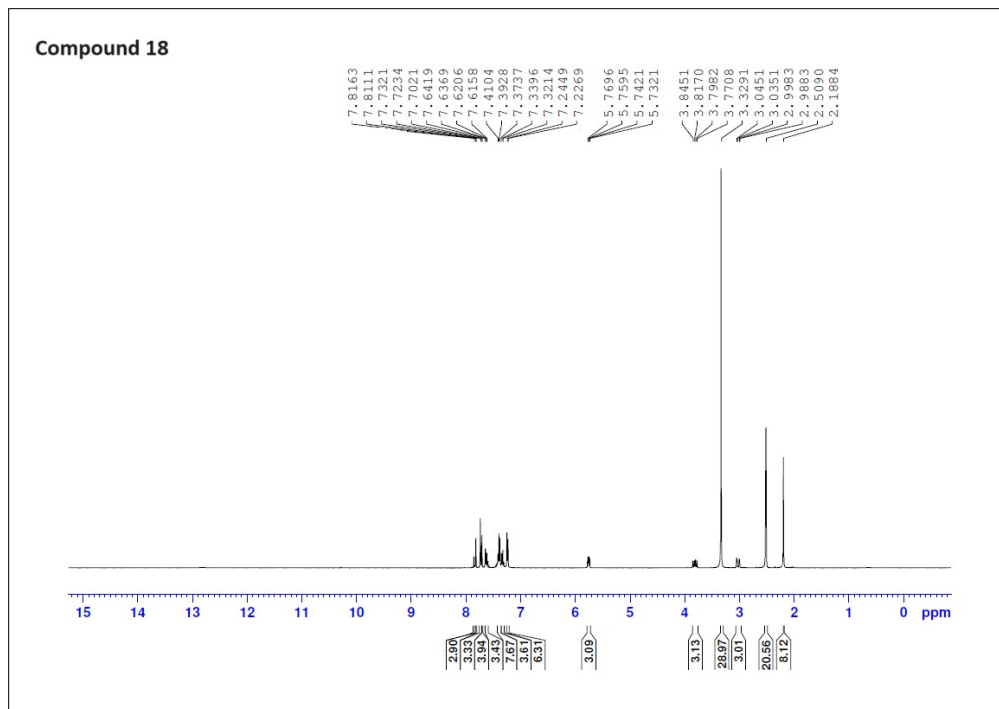

**<sup>1</sup>H NMR of compound 18**

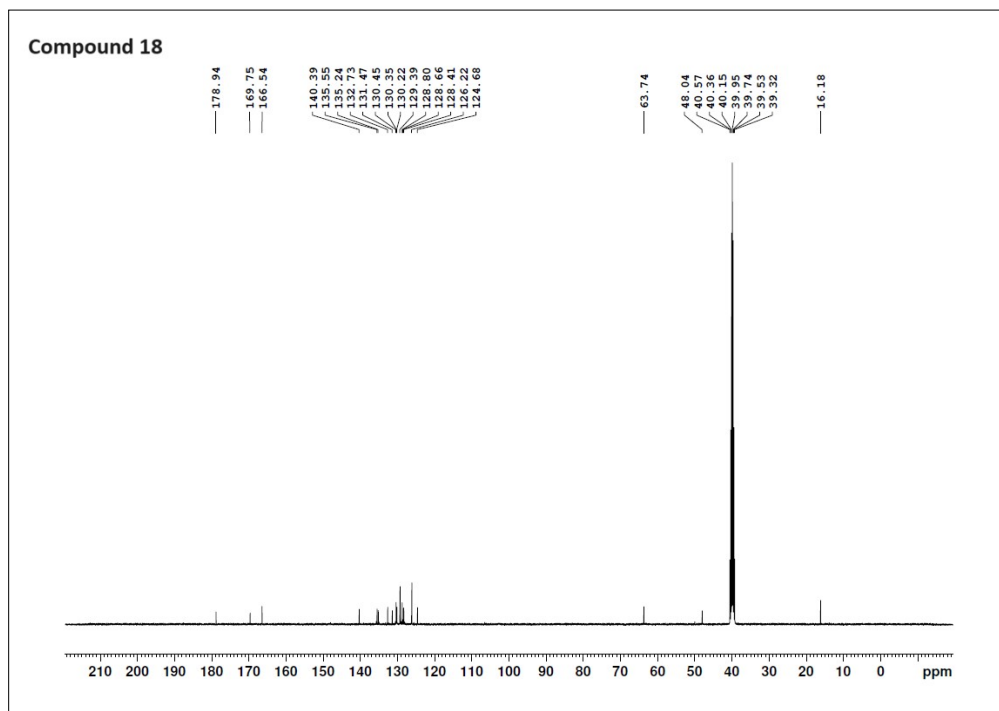

**<sup>13</sup>C NMR of compound 18**

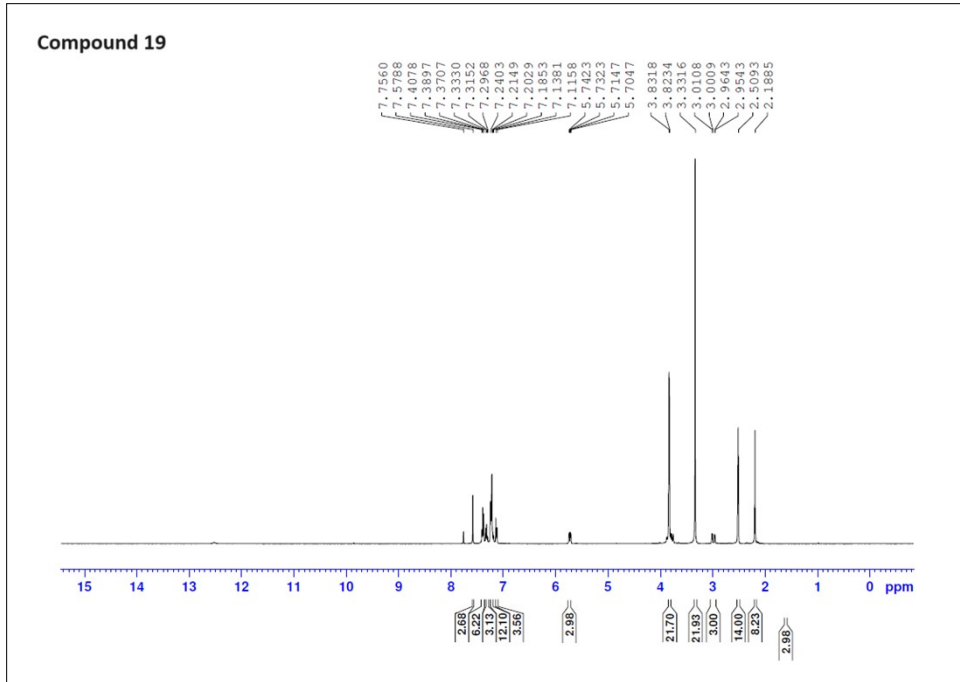

**<sup>1</sup>H NMR of compound 19**

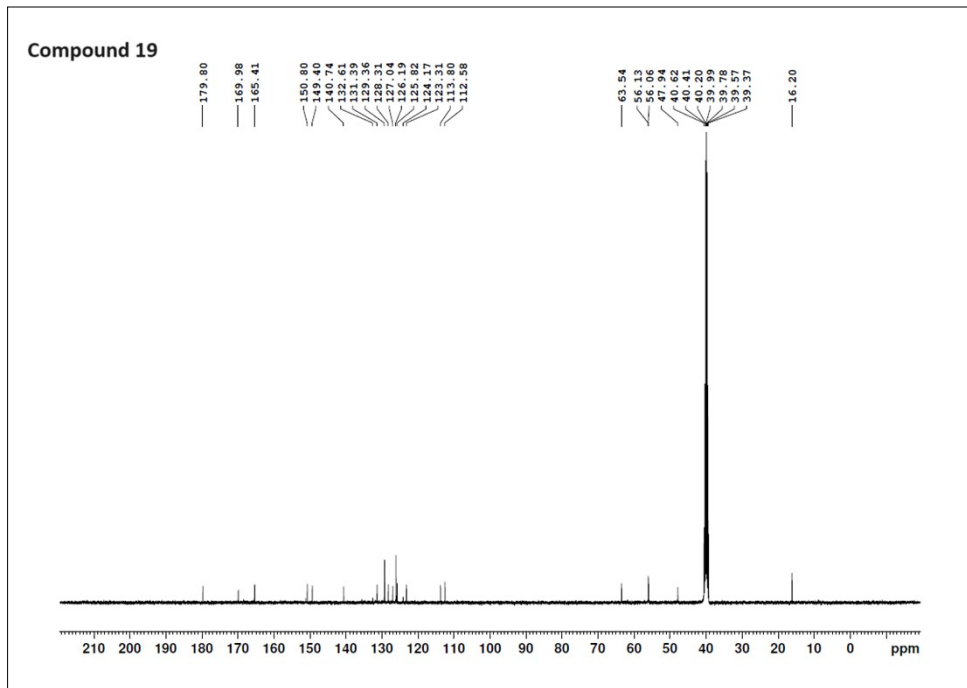

**<sup>13</sup>C NMR of compound 19**
